# Supplementary material for: A Resident-driven Initiative to Increase Bedside Teaching on Interdisciplinary Rounds
Source: PubMed Central journal article supplement — Pediatr Qual Saf. 2021 May 19;6(3):e408. doi: 10.1097/pq9.0000000000000408 (PMC8143765; doi:10.1097/pq9.0000000000000408), 2021-05-19
Supplement: pqs-6-e408-s001.pdf [file pqs-6-e408-s001.pdf]

Thinking back on your experience on rounds this past week, please respond to the following questions so we can help improving rounds and bedside teaching!

- 1) Date of Survey Completion:  
\_\_\_\_\_ (MM/DD/YYYY)
- 2) What team are you currently on?  
 Blue  Red  Adolescent  BS  95
- 3) On average, how much time per day did you spend with patients at the bedside both during and after rounds?  
 < 30 minutes  30 minutes - 1 hour  1 - 2 hours  >2 hours
- 4) How often did you finish calling consults, writing notes, and placing essential orders prior to noon conference?  
 Every day  Most days  Some days  Rarely  Not at all  Not Applicable
- 5) How many days were you delayed in attending noon conference due to rounds running late?  
 Every day  Most days  Some days  Rarely  Not at all  Not Applicable
- 6) How often did you examine a patient with the attending/team, either during or after rounds?  
 Every day  Most days  Some days  Rarely  Not at all  Not Applicable
- 7) I learned something on rounds this week to improve my physical examination skills or improve my confidence in my physical exam.  
 Strongly Disagree  Disagree  Neutral  Agree  Strongly Agree
- 8) I learned something on rounds to improve my clinical decision making skills.  
 Strongly Disagree  Disagree  Neutral  Agree  Strongly Agree
- 9) On a scale of 1 to 10, rate your satisfaction with the learning experience doing a physical exam with the attending/team (either during or after rounds).  
(1 = very dissatisfied; 10 = very satisfied)  
 1  2  3  4  5  6  7  8  9  10
- 10) On a scale of 1 to 10, rate your level of satisfaction with the overall experience on rounds last week.  
 1  2  3  4  5  6  7  8  9  10
- 11) How could your experience on rounds this past week have been improved?

Supplemental Figure 1: Weekly survey distributed to interns.
